# Supplementary material for: Impact of Different Pasteurization Techniques and Subsequent Ultrasonication on the In Vitro Bioaccessibility of Carotenoids in Valencia Orange (Citrus sinensis (L.) Osbeck) Juice
Source: MDPI journal article supplement (doi:10.3390/antiox9060534), 2020-06-18
Supplement: s1 [file s1]

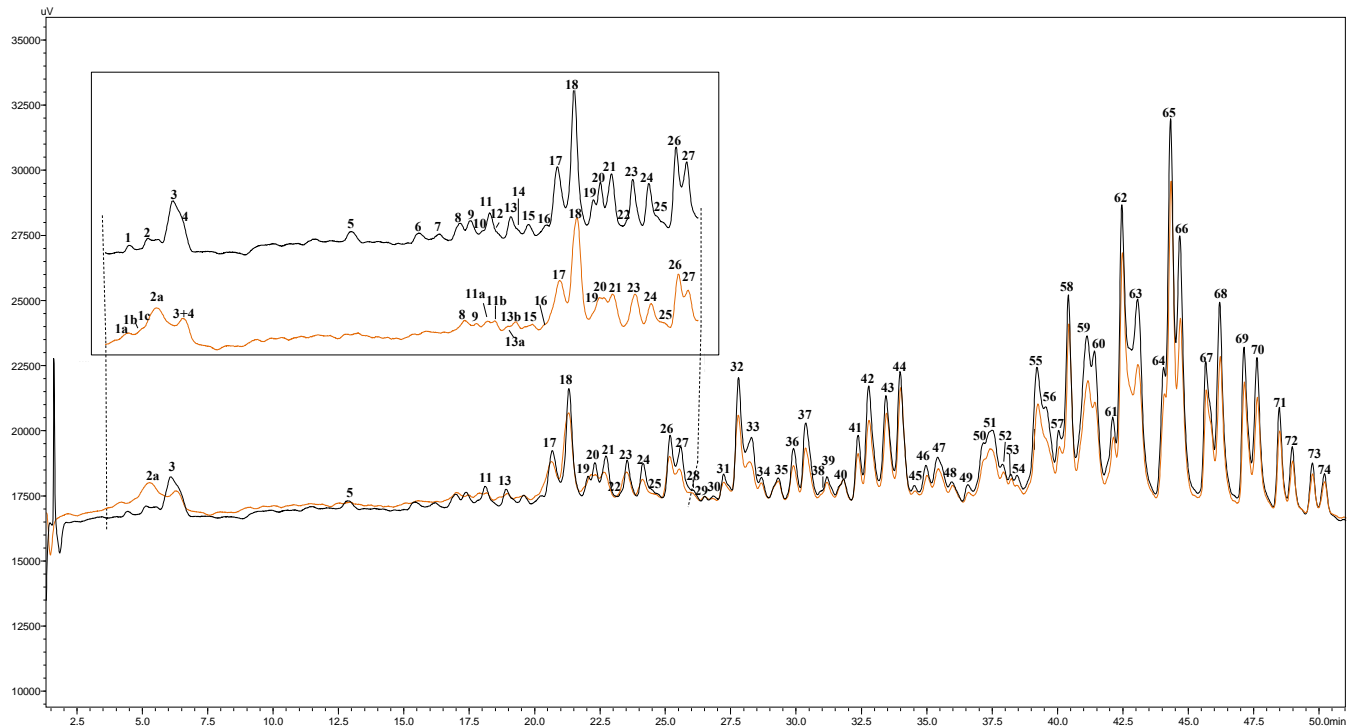

**Figure S1.** Separation of carotenoids from orange juice before *in vitro* digestion (**black**) and after *in vitro* digestion (**orange**) by HPLC-DAD (450 nm). Due to slightly different weights and injection volumes, peak areas are not comparable. Peak assignment is given in Table 3.
